# Supplementary material for: Surface passivation of hematite photoanodes using iron phosphate
Source: Royal Society of Chemistry journal article supplement (doi:10.1039/d2nj06038h), 2023-01-01
Supplement: d2nj06038h1.pdf [file d2nj06038h1.pdf]

## Surface passivation of hematite photoanodes using iron phosphate

Fatemeh Parveh, Amin Yourdkhani \* and Reza Poursalehi

Materials Engineering Department, Faculty of Engineering, Tarbiat Modares University, Tehran, Iran.

\*E-mail: a.yourd@modares.ac.ir; Fax: +98 21 8288-4390; Tel: +98 21 8288-3348

**Table. S1.** Different percentages of elements obtained from EDS analysis for crystalline and amorphous iron phosphate

| <b>Element</b>     | <b>Weight%</b> | <b>Atomic%</b> |
|--------------------|----------------|----------------|
| <b>Crystalline</b> |                |                |
| <b>O</b>           | 23.04          | 67.42          |
| <b>P</b>           | 0.42           | 0.63           |
| <b>Fe</b>          | 3.95           | 3.31           |
| <b>Sn</b>          | 72.59          | 28.63          |
| <b>Sum</b>         | 100.00         | 100.00         |
| <b>Amorphous</b>   |                |                |
| <b>O</b>           | 23.71          | 67.68          |
| <b>P</b>           | 0.67           | 0.99           |

|            |        |        |
|------------|--------|--------|
| <b>Fe</b>  | 5.16   | 4.22   |
| <b>Sn</b>  | 70.47  | 27.12  |
| <b>Sum</b> | 100.00 | 100.00 |

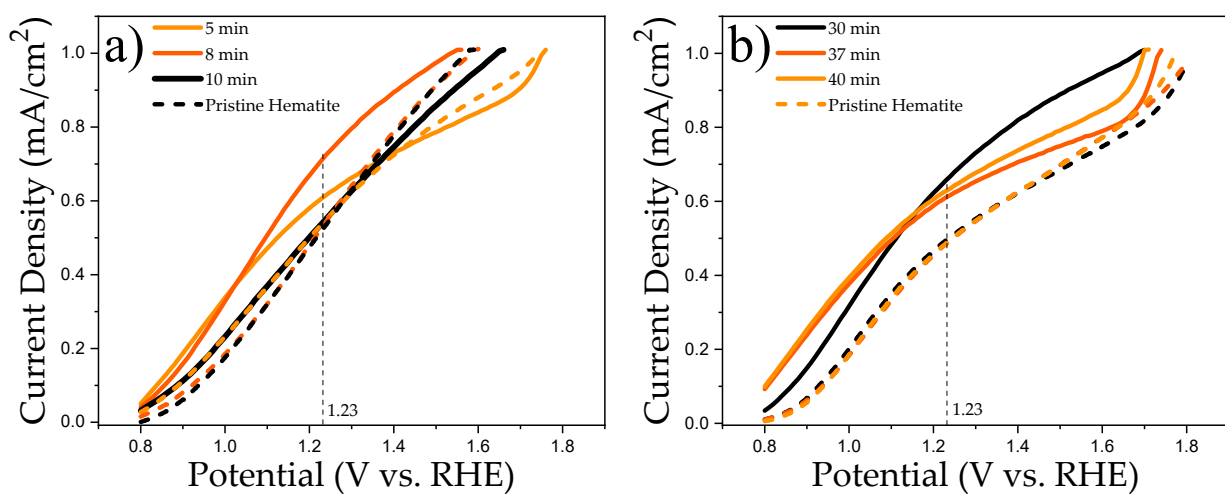

**Figure. S1.** J-V curves of the samples with different deposition time for  $\text{FePO}_4 \cdot 2\text{H}_2\text{O}$  in a) crystalline and b) amorphous states at 1.23 V vs. RHE under 1.5 G AM light.

**Table. S2.** Photocurrent density for thin films of ( $\alpha$ - $\text{Fe}_2\text{O}_3$ ) and modified with crystalline and amorphous iron phosphate, with different thicknesses at 1.23 V vs. RHE.

| <b>Sample</b> | <b>Current density<br/>(<math>\text{mA}\cdot\text{cm}^{-2}</math>) of (<math>\alpha</math>-<br/><math>\text{Fe}_2\text{O}_3</math>)</b> | <b>Current density<br/>(<math>\text{mA}\cdot\text{cm}^{-2}</math>) of (<math>\alpha</math>-<br/><math>\text{Fe}_2\text{O}_3/\text{Fe-Pi}</math>)</b> | <b><math>V_{\text{on}}</math> (V vs. RHE)<br/>before and after the<br/>modification</b> |
|---------------|-----------------------------------------------------------------------------------------------------------------------------------------|------------------------------------------------------------------------------------------------------------------------------------------------------|-----------------------------------------------------------------------------------------|
|---------------|-----------------------------------------------------------------------------------------------------------------------------------------|------------------------------------------------------------------------------------------------------------------------------------------------------|-----------------------------------------------------------------------------------------|

| <b>Crystalline</b> |      |      |                             |
|--------------------|------|------|-----------------------------|
| <b>5 min</b>       | 0.53 | 0.60 | 0.80 $\longrightarrow$ 0.75 |
| <b>8 min</b>       | 0.52 | 0.71 | 0.81 $\longrightarrow$ 0.76 |
| <b>10 min</b>      | 0.53 | 0.55 | 0.83 $\longrightarrow$ 0.77 |
| <b>Amorphous</b>   |      |      |                             |
| <b>30 min</b>      | 0.49 | 0.65 | 0.83 $\longrightarrow$ 0.74 |
| <b>37 min</b>      | 0.48 | 0.61 | 0.83 $\longrightarrow$ 0.72 |
| <b>40 min</b>      | 0.48 | 0.62 | 0.83 $\longrightarrow$ 0.72 |

The separation and catalytic efficiencies of the photo electrode were evaluated using the method reported by Dotan et al. [1]. The photocurrent relates to the separation and catalytic efficiencies according to the following equation [1]:

$$J_{H_2O} = J_{abs} \times \eta_{separation} \times \eta_{catalytic} \quad (1)$$

where  $J_{abs}$  is the photon absorption rate, which is presented as a current. It is determined by multiplying the AM1.5G spectrum by the absorption spectrum followed by integration over wavelength.  $\eta_{separation}$  is the charge separation efficiency.  $\eta_{catalytic}$  is also the catalytic efficiency for water oxidation. By adding  $Na_2SO_3$  to the electrolyte, it acts as a very effective hole scavenger and the corresponding photocurrent is denoted as  $J_{Na_2SO_3}$  as following:

$$J_{Na_2SO_3} = J_{abs} \times \eta_{separation} \quad (2)$$

Based on the above two equations,  $\eta_{\text{separation}}$  and  $\eta_{\text{catalytic}}$  are obtained according to the following equations:

$$\eta_{\text{catalytic}} = \frac{J_{H_2O}}{J_{Na_2SO_3}} \quad (3)$$

$$\eta_{\text{separation}} = \frac{J_{Na_2SO_3}}{J_{\text{abs}}} \quad (4)$$

1. H. Dotan, K. Sivula, M. Gratzel, A. Rothschild, S. C. Warren, *Energy Environ. Sci.* 2011, 4, 958–964.
